# Supplementary material for: In silico identification of potential therapeutic targets in the TGF-β signal transduction pathway
Source: Royal Society of Chemistry journal article supplement (doi:10.1039/c3mb70259f), 2013-12-10
Supplement: c3mb70259f.pdf [file c3mb70259f.pdf]

## Supplementary Information: Figures

**Figure S1. Simulation of the effects of pancreatic cancer mutations on TGF- $\beta$  signaling dynamics.** Same simulations as in Figure 2 with the normal dynamics of the HaCaT case from Figures 2A and 2D and of the Colo-357 case from Figures 2B and 2E. (A) Results for nuclear phosphorylated Smad2 and (B) nuclear Smad4 species. Solid lines represent the normal dynamics of the model and dashed lines represent those of the model with the mutation described in the caption of Figure 2.

**Figure S2. Simulation of the effects of endocytosis inhibitors on TGF- $\beta$  signaling dynamics.** Same simulations as in Figure 3 with the normal dynamics of the HaCaT case from Figure 3A and those with potassium depletion (-KCl) and Nystatin of Figures 3B and 3C, respectively. Results for the ratio of phosphorylated Smad2 to total Smad2 for (A) potassium depletion (-KCl) and (B) Nystatin treatment. Solid lines represent the normal dynamics of the model and dashed lines represent those of the model with the endocytosis inhibitors described in the caption of Figure 3.

**Figure S3. Schematic illustration of the Smad-dependent TGF- $\beta$  signaling pathway model with targetable processes highlighted.** Same illustration as Figure 1 with reaction arrows colored if they are specifically targetable for the 'receptor downregulation' mutation (Figure 6). Colors correspond to the parameter colors in Figure 6.

## Supplementary Information: Tables

**Table S1. System of ODEs for each modeled species.** Equations track the rate of change in concentration of each species in the model,<sup>19</sup> which are illustrated in Fig. 1. Overbars indicate receptor species internalized in the endosome. The prefix *p* denotes that a species is phosphorylated and the subscripts *c* and *n* represent cytoplasmic and nuclear species, respectively.

$$\begin{aligned} \frac{d[RII]}{dt} &= k_{syn,RII} - k_{deg,RII}[RII] - k_{id}[TGF\beta][RII] + k_{id}[TGF\beta] \cdot RI_{-1} + k_{17,rec}(\overline{[C_1]} + \overline{[C_2]}) - k_{19,rec}[RII] + k_{19,rec}[RII] \\ \frac{d[TGF\beta \cdot RI]}{dt} &= k_{19,rec}[RII] - k_{19,rec}[TGF\beta \cdot RI] - k_{2a}[TGF\beta \cdot RI] + k_{2a}[TGF\beta \cdot RI] + k_{2d}([C_1] + [C_2]) + k_{2d}(\overline{[C_1]} + \overline{[C_2]}) \\ \frac{d[RI_1]}{dt} &= k_{syn,RI} - k_{deg,RI_1}[RI_1] - k_{2b}[TGF\beta \cdot RI][RI_1] + k_{2d}[C_1] + k_{17,rec}[\overline{[C_1]}] - k_{18,rec}[RI_1] + k_{18,rec}[RI_1] \\ \frac{d[RI_2]}{dt} &= k_{syn,RI} - k_{deg,RI_2}[RI_2] - k_{2b}[TGF\beta \cdot RI][RI_2] + k_{2d}[C_2] + k_{17,rec}[\overline{[C_2]}] - k_{18,rec}[RI_2] + k_{18,rec}[RI_2] \\ \frac{d[C_1]}{dt} &= k_{2a}[TGF\beta \cdot RI][RI_1] - k_{2d}[C_1] - k_{3,mit}[C_1] - k_{16,deg}[C_1] - k_{30a,1}[C_1][S7] \\ \frac{d[C_2]}{dt} &= k_{2a}[TGF\beta \cdot RI][RI_2] - k_{2d}[C_2] - k_{3,mit}[C_2] - k_{16,deg}[C_2] - k_{30a,2}[C_2][S7] \\ \frac{d[\overline{[C_1]}]}{dt} &= k_{3,mit}[C_1] - k_{16,deg}[\overline{[C_1]}] + k_{17,rec}[\overline{[C_1]}] + k_{17,rec}[\overline{[C_2]}] - k_{17,rec}[\overline{[C_1]}] \\ \frac{d[\overline{[C_2]}]}{dt} &= k_{3,mit}[C_2] - k_{16,deg}[\overline{[C_2]}] + k_{17,rec}[\overline{[C_2]}] - k_{17,rec}[\overline{[C_2]}] \\ \frac{d[\overline{[C_1] \cdot S1}]}{dt} &= k_{16,deg}[\overline{[C_1] \cdot S1}] - k_{16,deg}[\overline{[C_1]} \cdot S1] - k_{3,phos}[\overline{[C_1]} \cdot S1] \\ \frac{d[\overline{[C_2] \cdot S2}]}{dt} &= k_{16,deg}[\overline{[C_2] \cdot S2}] - k_{16,deg}[\overline{[C_2]} \cdot S2] - k_{3,phos}[\overline{[C_2]} \cdot S2] \\ \frac{d[S1_c]}{dt} &= k_{syn,RS} - k_{deg,RS}[S1_c] + k_{14,deg}[\overline{[C_1]}] + k_{14,deg}[\overline{[C_2]}] + k_{14,deg}[S1_c] + k_{12,exp}[S1_n] \\ \frac{d[S2_c]}{dt} &= k_{syn,RS} - k_{deg,RS}[S2_c] + k_{14,deg}[\overline{[C_2]}] + k_{14,deg}[\overline{[C_1]}] + k_{14,deg}[S2_c] + k_{12,exp}[S2_n] \\ \frac{d[S4_c]}{dt} &= k_{syn,S4} - k_{deg,S4}[S4_c] + k_{14,deg}[\overline{[C_2]}] + k_{14,deg}[\overline{[C_1]}] + k_{14,deg}[S4_c] + k_{14,exp}[S4_n] \\ \frac{d[PS1_c]}{dt} &= k_{3,phos}[\overline{[C_1]} \cdot S1] - k_{16,deg}[PS1_c] + k_{16,deg}[PS1_c] - k_{13,imp}[PS1_c] \\ \frac{d[PS2_c]}{dt} &= k_{3,phos}[\overline{[C_2]} \cdot S2] - k_{16,deg}[PS2_c] + k_{16,deg}[PS2_c] - k_{13,imp}[PS2_c] \end{aligned}$$

$$\begin{aligned} \frac{d[PSIS4_c]}{dt} &= k_{10,deg}[PSIS4_c] - k_{10,deg}[PSIS4_c] - k_{10,deg}[PSIS4_c] - k_{10,deg}[PSIS4_c] \\ \frac{d[PS2S4_c]}{dt} &= k_{10,deg}[PS2S4_c] - k_{10,deg}[PS2S4_c] - k_{10,deg}[PS2S4_c] - k_{10,deg}[PS2S4_c] \\ \frac{d[PSIS4_n]}{dt} &= k_{10,deg}[PSIS4_n] - k_{10,deg}[PSIS4_n] + k_{10,deg}[PSIS4_n] - k_{10,deg}[PSIS4_n] \\ \frac{d[PS2S4_n]}{dt} &= k_{10,deg}[PS2S4_n] - k_{10,deg}[PS2S4_n] + k_{10,deg}[PS2S4_n] - k_{10,deg}[PS2S4_n] \\ \frac{d[S1_n]}{dt} &= k_{9d}[SIS4_n] + k_{11,deg}[PSI_n] + k_{12,imp}[S1_n] - k_{12,exp}[S1_n] \\ \frac{d[S2_n]}{dt} &= k_{9d}[S2S4_n] + k_{11,deg}[PSI_n] + k_{12,imp}[S2_n] - k_{12,exp}[S2_n] \\ \frac{d[S4_n]}{dt} &= k_{9d}([SIS4_n] + [S2S4_n]) - k_{10,deg}([PSI_n] + [PS2_n]) + k_{10,deg}([PSIS4_n] + [PS2S4_n]) + k_{14,imp}[S4_n] - k_{14,exp}[S4_n] \\ \frac{d[PSI_n]}{dt} &= -k_{10,deg}[PSI_n] + k_{10,deg}[PSIS4_n] - k_{11,deg}[PSI_n] + k_{11,deg}[PSI_n] - k_{13,deg}[PSI_n] \\ \frac{d[PS2_n]}{dt} &= -k_{10,deg}[PS2_n] + k_{10,deg}[PS2S4_n] - k_{11,deg}[PS2_n] + k_{11,deg}[PS2_n] - k_{13,deg}[PS2_n] \\ \frac{d[RI_1]}{dt} &= k_{18,rec}[RI_1] - k_{19,rec}[RI_1] \\ \frac{d[RI_2]}{dt} &= k_{18,rec}[RI_2] - k_{19,rec}[RI_2] \\ \frac{d[RII]}{dt} &= k_{19,rec}[RII] - k_{19,rec}[RII] \\ \frac{d[S7]}{dt} &= \frac{k_{30a,S7} + k_{10,deg}K_{1,1}[PSIS4_n] + k_{10,deg}K_{1,2}[PS2S4_n] - k_{deg,S7}[S7] - k_{30a,1}[C_1][S7] - k_{30a,2}[C_2][S7]}{1 + K_{1,1}[PSIS4_n] + K_{1,2}[PS2S4_n]} \end{aligned}$$

**Table S2. Parameter values used in the simulations.** They have been obtained from references <sup>10, 19, 22, 56-64</sup>, as described in reference <sup>19</sup>.

| Name          | Description                                                | HaCaT                 | BAEC                  | C2C12                 | Unit                                  |
|---------------|------------------------------------------------------------|-----------------------|-----------------------|-----------------------|---------------------------------------|
| $k_{syn,RII}$ | Constitutive production of type II receptors               | 8.00                  | 8.00                  | 8.00                  | molec min <sup>-1</sup>               |
| $k_{deg,RII}$ | Constitutive degradation of type II receptors              | $2.78 \times 10^{-2}$ | $2.78 \times 10^{-2}$ | $2.78 \times 10^{-2}$ | min <sup>-1</sup>                     |
| $k_{syn,RI}$  | Constitutive production of type I receptors                | 8.00                  | 8.00                  | 8.00                  | molec min <sup>-1</sup>               |
| $k_{deg,RI}$  | Constitutive degradation of type I receptors               | $2.78 \times 10^{-2}$ | $2.78 \times 10^{-2}$ | $2.78 \times 10^{-2}$ | min <sup>-1</sup>                     |
| $k_{syn,RS}$  | Constitutive production of R-Smads                         | $2.74 \times 10^1$    | $2.74 \times 10^1$    | $2.74 \times 10^1$    | molec min <sup>-1</sup>               |
| $k_{deg,RS}$  | Constitutive degradation of R-Smads                        | $6.46 \times 10^{-4}$ | $6.46 \times 10^{-4}$ | $6.46 \times 10^{-4}$ | min <sup>-1</sup>                     |
| $k_{syn,S4}$  | Constitutive production of Smad4                           | $5.00 \times 10^1$    | $5.00 \times 10^1$    | $5.00 \times 10^1$    | molec min <sup>-1</sup>               |
| $k_{deg,S4}$  | Constitutive degradation of Smad4                          | $1.20 \times 10^{-3}$ | $1.20 \times 10^{-3}$ | $1.20 \times 10^{-3}$ | min <sup>-1</sup>                     |
| $k_{syn,S7}$  | Constitutive production of Smad7                           | $1.51 \times 10^2$    | 0                     | 0                     | molec min <sup>-1</sup>               |
| $k_{deg,S7}$  | Constitutive degradation of Smad7                          | $3.88 \times 10^{-3}$ | $3.88 \times 10^{-3}$ | $3.88 \times 10^{-3}$ | min <sup>-1</sup>                     |
| $k_{1a}$      | Association of ligand and type II receptor                 | $6.60 \times 10^{-3}$ | $1.20 \times 10^{-2}$ | $6.60 \times 10^{-4}$ | molec <sup>-1</sup> min <sup>-1</sup> |
| $k_{1d}$      | Dissociation of ligand/type II receptor complex            | $2.98 \times 10^{-1}$ | $2.98 \times 10^{-1}$ | $2.98 \times 10^{-1}$ | min <sup>-1</sup>                     |
| $k_{2a}$      | Association of ligand/type II receptor and type I receptor | $6.60 \times 10^{-3}$ | $1.44 \times 10^{-3}$ | $3.76 \times 10^{-2}$ | molec <sup>-1</sup> min <sup>-1</sup> |
| $k_{2d}$      | Dissociation of receptor complex                           | $2.98 \times 10^{-1}$ | $2.98 \times 10^{-1}$ | $2.98 \times 10^{-1}$ | min <sup>-1</sup>                     |
| $k_{3int}$    | Internalization of receptor complex                        | $3.95 \times 10^{-1}$ | $3.11 \times 10^{-1}$ | 3.02                  | min <sup>-1</sup>                     |
| $k_{4a}$      | Association of receptor complex and R-Smad                 | $1.50 \times 10^{-4}$ | $2.12 \times 10^{-4}$ | $1.92 \times 10^{-5}$ | molec <sup>-1</sup> min <sup>-1</sup> |
| $k_{4d}$      | Dissociation of receptor complex and R-Smad                | $9.71 \times 10^{-1}$ | 9.61                  | 9.68                  | min <sup>-1</sup>                     |
| $k_{5phos}$   | Phosphorylation of R-Smad                                  | $4.48 \times 10^4$    | $4.48 \times 10^4$    | $4.48 \times 10^4$    | min <sup>-1</sup>                     |
| $k_{6a}$      | Association of cytosolic phospho-R-Smad and Smad4          | $6.00 \times 10^{-3}$ | $8.94 \times 10^{-3}$ | $5.31 \times 10^{-2}$ | molec <sup>-1</sup> min <sup>-1</sup> |
| $k_{6d}$      | Dissociation of cytosolic phospho-R-Smad-Smad4             | $1.46 \times 10^3$    | $1.46 \times 10^3$    | $1.46 \times 10^3$    | min <sup>-1</sup>                     |
| $k_{7imp}$    | Nuclear import of phospho-R-Smad-Smad4                     | $8.10 \times 10^{-1}$ | $2.70 \times 10^{-1}$ | 7.52                  | min <sup>-1</sup>                     |
| $k_{8dp}$     | Dephosphorylation of nuclear phospho-R-Smad-Smad4          | $2.52 \times 10^{-2}$ | $2.52 \times 10^{-2}$ | $2.52 \times 10^{-2}$ | min <sup>-1</sup>                     |
| $k_{9d}$      | Dissociation of nuclear R-Smad-Smad4                       | $1.01 \times 10^{-1}$ | $9.60 \times 10^{-1}$ | 1.01                  | min <sup>-1</sup>                     |
| $k_{10a}$     | Association of nuclear phospho-R-Smad and Smad4            | $1.67 \times 10^{-4}$ | $3.08 \times 10^{-5}$ | $1.37 \times 10^{-3}$ | molec <sup>-1</sup> min <sup>-1</sup> |
| $k_{10d}$     | Dissociation of nuclear phospho-R-Smad-Smad4               | $9.09 \times 10^{-1}$ | 2.50                  | 3.83                  | min <sup>-1</sup>                     |
| $k_{11dp}$    | Dephosphorylation of phospho-R-Smad                        | $2.52 \times 10^{-2}$ | $2.52 \times 10^{-2}$ | $2.52 \times 10^{-2}$ | min <sup>-1</sup>                     |
| $k_{12imp}$   | Nuclear import of R-Smad                                   | $1.62 \times 10^{-1}$ | $1.62 \times 10^{-1}$ | $1.62 \times 10^{-1}$ | min <sup>-1</sup>                     |
| $k_{12exp}$   | Nuclear export of R-Smad                                   | $3.48 \times 10^{-1}$ | $3.48 \times 10^{-1}$ | $3.48 \times 10^{-1}$ | min <sup>-1</sup>                     |
| $k_{13imp}$   | Nuclear import of phospho-R-Smad                           | $5.03 \times 10^{-1}$ | $5.03 \times 10^{-2}$ | 4.85                  | min <sup>-1</sup>                     |
| $k_{14imp}$   | Nuclear import of Smad4                                    | $2.01 \times 10^{-2}$ | $2.31 \times 10^{-2}$ | $1.45 \times 10^{-1}$ | min <sup>-1</sup>                     |
| $k_{14exp}$   | Nuclear export of Smad4                                    | $1.74 \times 10^{-1}$ | $1.74 \times 10^{-1}$ | $1.74 \times 10^{-1}$ | min <sup>-1</sup>                     |
| $k_{15deg}$   | Constitutive degradation of nuclear phospho-R-Smad         | $5.40 \times 10^{-3}$ | $2.00 \times 10^{-3}$ | $4.33 \times 10^{-2}$ | min <sup>-1</sup>                     |
| $k_{16deg}$   | Constitutive degradation of receptor complex               | $2.78 \times 10^{-2}$ | $2.78 \times 10^{-2}$ | $2.78 \times 10^{-2}$ | min <sup>-1</sup>                     |
| $k_{17rec}$   | Recycling of receptor complex                              | $3.95 \times 10^{-2}$ | $3.95 \times 10^{-2}$ | $3.95 \times 10^{-2}$ | min <sup>-1</sup>                     |
| $k_{18int}$   | Internalization of type II receptor                        | $3.95 \times 10^{-1}$ | $3.11 \times 10^{-1}$ | 3.02                  | min <sup>-1</sup>                     |
| $k_{18rec}$   | Recycling of type II receptor                              | $3.95 \times 10^{-2}$ | $3.95 \times 10^{-2}$ | $3.95 \times 10^{-2}$ | min <sup>-1</sup>                     |
| $k_{19int}$   | Internalization of type I receptor                         | $3.95 \times 10^{-1}$ | $3.11 \times 10^{-1}$ | 3.02                  | min <sup>-1</sup>                     |
| $k_{19rec}$   | Recycling of type I receptor                               | $3.95 \times 10^{-2}$ | $3.95 \times 10^{-2}$ | $3.95 \times 10^{-2}$ | min <sup>-1</sup>                     |
| $k_{20a,1}$   | Association of Smad7 and $C_1$                             | $8.72 \times 10^{-4}$ | $9.38 \times 10^{-4}$ | $8.72 \times 10^{-4}$ | molec <sup>-1</sup> min <sup>-1</sup> |
| $k_{20a,2}$   | Association of Smad7 and $C_2$                             | $2.96 \times 10^{-5}$ | $1.50 \times 10^{-6}$ | $1.50 \times 10^{-6}$ | molec <sup>-1</sup> min <sup>-1</sup> |
| $k_{lip,1}$   | Ligand-induced production of Smad7 through $pSIS4_n$       | 0                     | $4.26 \times 10^2$    | 0                     | molec min <sup>-1</sup>               |
| $k_{lip,2}$   | Ligand-induced production of Smad7 through $pS2S4_n$       | $8.53 \times 10^3$    | 0                     | $5.54 \times 10^2$    | molec min <sup>-1</sup>               |
| $K_{A,1}$     | Association constant of $pSIS4_n$ with Smad7 promoter      | 0                     | $7.22 \times 10^{-5}$ | 0                     | molec <sup>-1</sup>                   |
| $K_{A,2}$     | Association constant of $pS2S4_n$ with Smad7 promoter      | $1.03 \times 10^{-6}$ | 0                     | $1.51 \times 10^{-3}$ | molec <sup>-1</sup>                   |

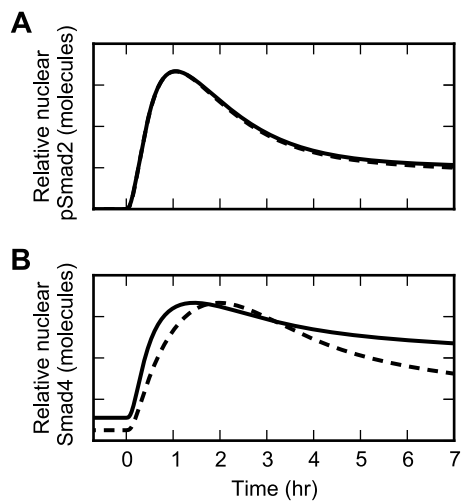

**Figure S1**

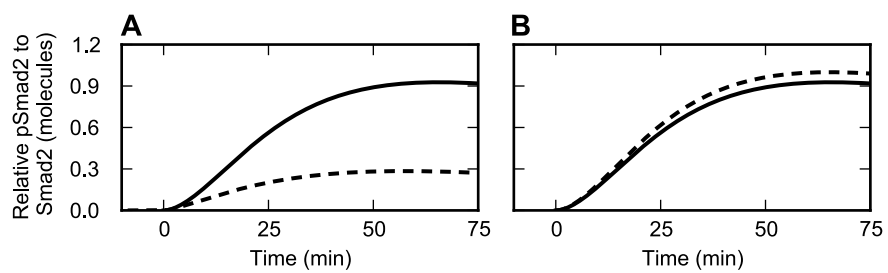

**Figure S2**

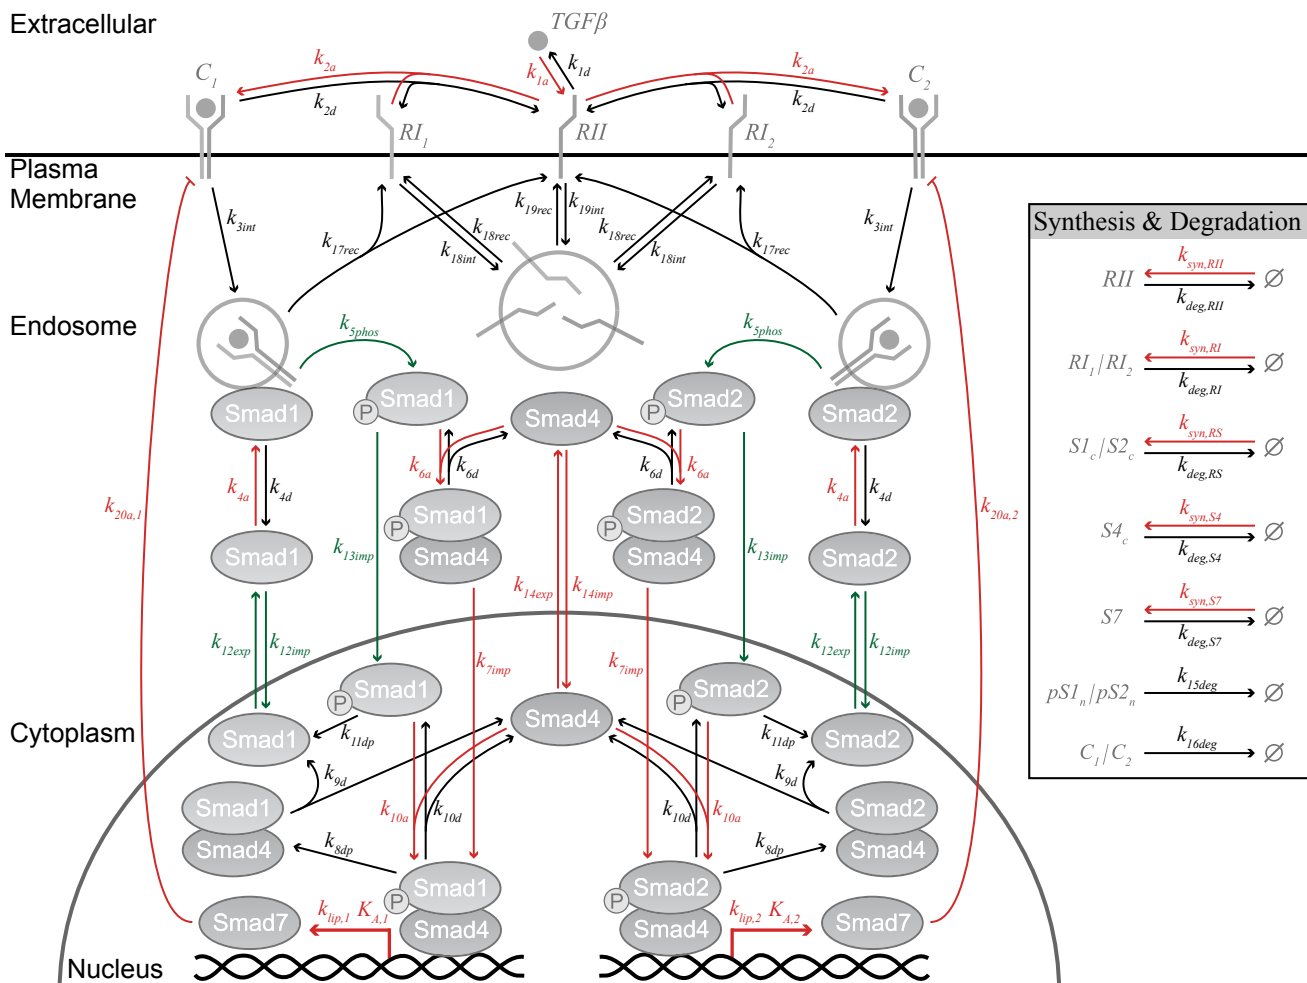

**Figure S3**
